# Supplementary material for: Simulation-Based Training for Reframing Psychiatric Nurses’ Communication and History-Taking Competencies: A Quasi- Experimental Study
Source: Research Square preprint supplement (doi:10.21203/rs.3.rs-8496718/v1), 2026-02-03
Supplement: Supplementary file 1 [file e04201cca545acb297635cf5.pdf]

## Knowledge assessment scale (khalil A., 2025)

| No. | statements                                                                                                                     | Agree | unsure | Disagree |
|-----|--------------------------------------------------------------------------------------------------------------------------------|-------|--------|----------|
| 1.  | Effective communication is crucial in psychiatric nursing.                                                                     |       |        |          |
| 2.  | Managing emotional distress is a unique challenge when communicating with psychiatric patients.                                |       |        |          |
| 3.  | Demonstrating empathy and active listening is a key technique for establishing rapport and trust in psychiatric nursing        |       |        |          |
| 4.  | Maintaining a non-judgmental attitude fosters trust and openness in building a therapeutic relationship.                       |       |        |          |
| 5.  | Establishing rapport and trust is an ongoing process in psychiatric nursing.                                                   |       |        |          |
| 6.  | Using therapeutic communication techniques is essential for developing a positive nurse-patient relationship.                  |       |        |          |
| 7.  | Nurses should actively involve patients in their care decisions to strengthen the therapeutic relationship.                    |       |        |          |
| 8.  | Body language is an example of a non-verbal communication technique.                                                           |       |        |          |
| 9.  | Empathetic understanding and reflection are key components of active listening skills.                                         |       |        |          |
| 10. | Empathetic responding and validation techniques aim to acknowledge and understand the patient's feelings.                      |       |        |          |
| 11. | A comprehensive psychiatric history provides insight into the patient's mental health.                                         |       |        |          |
| 12. | Following a systematic set of relevant questions and prompts is a structured approach to psychiatric history taking.           |       |        |          |
| 13. | Asking open-ended questions during history taking encourages patients to share more about their experiences.                   |       |        |          |
| 14. | Allowing patients to share their narrative without interruption is crucial for gathering a comprehensive psychiatric history.  |       |        |          |
| 15. | Collaborating with family members or caregivers is valuable in obtaining a thorough psychiatric history                        |       |        |          |
| 16. | Considering cultural and linguistic factors is important when conducting psychiatric history taking.                           |       |        |          |
| 17. | Regularly reviewing and updating the psychiatric history is necessary for effective patient care.                              |       |        |          |
| 18. | Exploring the patient's concerns and feelings is a strategy for handling resistance or emotional distress during communication |       |        |          |
| 19. | De-escalation techniques aim to calm and reduce agitation in the patient.                                                      |       |        |          |
| 20. | You feel uncomfortable on the unit during emotionally charged situations with Psychiatric patients.                            |       |        |          |
| 21. | Addressing patient resistance during history-taking is a part of effective communication                                       |       |        |          |
| 22. | Demonstrating empathy during challenging situations can positively affect the nurse-patient relationship.                      |       |        |          |
| 23. | Collaborating with the interdisciplinary team is valuable in managing challenging situations during patient interactions.      |       |        |          |

|     |                                                                                                                                |  |  |  |
|-----|--------------------------------------------------------------------------------------------------------------------------------|--|--|--|
| 24. | Avoid discussing sensitive topics during history taking during patient's interaction                                           |  |  |  |
| 25. | Understanding cultural nuances is crucial for providing culturally sensitive care.                                             |  |  |  |
| 26. | Adapting care to respect and meet individual cultural needs ensures culturally sensitive care.                                 |  |  |  |
| 27. | Practical scenarios for applying communication skills provide opportunities for continuous improvement.                        |  |  |  |
| 28. | Feedback sessions are important to identify mistakes and areas for improvement in role-playing and simulation exercises.       |  |  |  |
| 29. | Collaborating with other healthcare professionals ensures a comprehensive and coordinated care plan for holistic patient care. |  |  |  |
| 30. | Promoting open and effective communication enhances communication within the healthcare team.                                  |  |  |  |
